# Supplementary material
Source: publisher figshare collection journal article supplement (https://tandf.figshare.com/articles/dataset/_/28082603)
Supplement: Supplementary file 1 [file 1]

**Author(s):**  
**Question:** Aspirin compared to Placebo for Elderly Patients  
**Setting:** Does it increase the prevalence of anemia in elderly patients?  
**Bibliography:**

| Certainty assessment     |                        |                      |               |              |                      |                      | № of patients     |                   | Effect                 |                                               | Certainty                     | Importance |
|--------------------------|------------------------|----------------------|---------------|--------------|----------------------|----------------------|-------------------|-------------------|------------------------|-----------------------------------------------|-------------------------------|------------|
| № of studies             | Study design           | Risk of bias         | Inconsistency | Indirectness | Imprecision          | Other considerations | Aspirin           | Placebo           | Relative (95% CI)      | Absolute (95% CI)                             |                               |            |
| Anemia                   |                        |                      |               |              |                      |                      |                   |                   |                        |                                               |                               |            |
| 4                        | non-randomised studies | serious <sup>a</sup> | not serious   | not serious  | serious <sup>b</sup> | none                 | 1733/9402 (18.4%) | 1514/9615 (15.7%) | OR 0.85 (0.52 to 1.38) | 20 fewer per 1.000 (from 69 fewer to 48 more) | ⊕⊕○○<br>Low <sup>a,b</sup>    |            |
| MCV                      |                        |                      |               |              |                      |                      |                   |                   |                        |                                               |                               |            |
| 3                        | non-randomised studies | serious <sup>a</sup> | not serious   | not serious  | not serious          | none                 | 454               | 513               | -                      | MD 0.31 lower (1.17 lower to 0.56 higher)     | ⊕⊕⊕○<br>Moderate <sup>a</sup> |            |
| MCH                      |                        |                      |               |              |                      |                      |                   |                   |                        |                                               |                               |            |
| 3                        | non-randomised studies | serious <sup>a</sup> | not serious   | not serious  | not serious          | none                 | 454               | 513               | -                      | MD 0.06 higher (0.37 lower to 0.49 higher)    | ⊕⊕⊕○<br>Moderate <sup>a</sup> |            |
| Hemoglobin concentration |                        |                      |               |              |                      |                      |                   |                   |                        |                                               |                               |            |
| 6                        | randomised trials      | not serious          | not serious   | not serious  | not serious          | none                 | 3979              | 4059              | -                      | MD 0.02 lower (0.26 lower to 0.21 higher)     | ⊕⊕⊕⊕<br>High                  |            |
| Hemoglobin Difference    |                        |                      |               |              |                      |                      |                   |                   |                        |                                               |                               |            |
| 4                        | randomised trials      | not serious          | not serious   | not serious  | not serious          | none                 | 3688              | 3708              | -                      | MD 0.11 lower (0.17 lower to 0.05 lower)      | ⊕⊕⊕⊕<br>High                  |            |

CI: confidence interval; MD: mean difference; OR: odds ratio

Explanations

- a. Most studies used were classified as Moderate risk of bias in the ROBINS-I tool.  
b. Different results between studies with wide confidence intervals in the majority of them.
